# Supplementary material
Source: PubMed Central journal article supplement (PMC314147)
Supplement: pnas_101_1_111__1.pdf [file pnas_101_1_111__1.pdf]

**Table 1. Crystallographic statistics**

| Data set                             | WT pH 8.5   | WT pH 5.5   | T203C pH 8.5 | T203C pH 5.5 | Y145C                    | Y145CT203C  |
|--------------------------------------|-------------|-------------|--------------|--------------|--------------------------|-------------|
| <b>Collection statistics</b>         |             |             |              |              |                          |             |
| Source <sup>*</sup>                  | UTSW        | UTSW        | X4A          | 7-1          | UTSW                     | 7-1         |
| Resolution, Å                        | 25-1.45     | 22-1.48     | 24-1.55      | 25-1.58      | 22-1.38                  | 25-1.60     |
| Observed/Multiplicity                | 36,969/2.8  | 32,536/3.1  | 31,021/3.9   | 30,578/4.7   | 38,868/3.1               | 28518/3.0   |
| Completeness, % <sup>†</sup>         | 93.3 (68.5) | 86.2 (72.4) | 95.3 (92.4)  | 99.9 (99.4)  | 83.5 <sup>‡</sup> (17.9) | 95.6 (90.2) |
| R <sub>sym</sub> , % <sup>†</sup>    | 4.1 (30.2)  | 5.6 (48.1)  | 5.7 (42.3)   | 4.6 (43.6)   | 3.4 (16.8)               | 7.8 (45.6)  |
| I/σ <sup>†</sup>                     | 22.3 (2.0)  | 13.0 (2.0)  | 18.5 (2.5)   | 24.5 (2.0)   | 24.2 (2.6)               | 26.2 (2.0)  |
| <b>Refinement Statistics</b>         |             |             |              |              |                          |             |
| No. of reflections (working/test)    | 34,744/2224 | 29,272/3245 | 28,513/2502  | 26,510/2938  | 36,515/2336              | 25,666/2823 |
| Resolution, Å                        | 25.0-1.45   | 25.0-1.48   | 25-1.55      | 25-1.58      | 25.0-1.38                | 25-1.60     |
| R <sub>work</sub> /R <sub>free</sub> | 18.7/20.1   | 21.6/23.1   | 19.4/21.4    | 20.8/23.3    | 18.3/20.2                | 19.3/21.0   |
| Rms deviation:                       |             |             |              |              |                          |             |
| Bond lengths, Å                      | 0.01        | 0.01        | 0.01         | 0.01         | 0.01                     | 0.01        |
| Bond angles, °                       | 1.74        | 1.69        | 1.67         | 1.78         | 1.74                     | 1.69        |

<sup>\*</sup> 7-1 at Stanford Synchrotron Radiation Laboratory (Stanford Linear Accelerator Center), X4A at National Synchrotron Light Source (Brookhaven National Laboratory), UTSW home R-axis IV detector Howard Hughes Medical Institute at University of Texas Southwestern Medical Center.

<sup>†</sup> Values for the highest resolution shell are given in parentheses.

<sup>‡</sup> 93.0% completeness from 22 to 1.50 Å; lower completeness to 1.38 Å due to imaging plate size.
