# Supplementary material
Source: PubMed Central journal article supplement (PMC314147)
Supplement: pnas_101_1_111__4.pdf [file pnas_101_1_111__4.pdf]

## Supporting Text

The thermodynamic analysis of a triple mutant shown below is a special case of the general theory of mutagenesis advanced by Horowitz and Fersht (1). Fig. 9 shows that the net free energy effect of a triple mutant (1, 2, 3) must be the sum of any path of mutations that leads from wild-type to the triple mutant. For the path highlighted in red:

$$\Delta G_{1,2,3} = \Delta G_1 + \Delta G_{2|1} + \Delta G_{3|1,2}, \quad [1]$$

where  $\Delta G_{2|1}$  is the energetic effect of mutation 2 in the background of mutation 1, and  $\Delta G_{3|1,2}$  is the energetic effect of mutation 3 in the background of the double mutation at sites 1 and 2. To simplify Eq. 1, we use the linkage relationships

(a)  $\Delta G_{2|1} = \Delta G_2 - \Delta\Delta G_{1,2}$ , and

(b)  $\Delta G_{3|1,2} = \Delta G_{3|1} - \Delta\Delta G_{2,3|1}$

where  $\Delta\Delta G_{2,3|1}$  is the two-way coupling free energy of mutations 2 and 3 in the background of mutation 1. The component terms of equation b can be further simplified by applying the following relationships:

(c)  $\Delta G_{3|1} = \Delta G_3 - \Delta\Delta G_{1,3}$

(d)  $\Delta^3 G_{1,2,3} = \Delta\Delta G_{2,3} - \Delta\Delta G_{2,3|1}$

Substituting equations a-d into Eq 1 and collecting terms, we find that

$\Delta G_{1,2,3} = \Delta G_1 + \Delta G_2 + \Delta G_3 - (\Delta\Delta G_{1,2} + \Delta\Delta G_{1,3} + \Delta\Delta G_{2,3}) + \Delta^3 G_{1,2,3}$ , a relationship identical to Eq. 2 in the text. Thus, the free energy change of a triple mutant is the summed effect of the single mutant effects, the two-way thermodynamic couplings between them, and the three-way coupling energy.

1. Horowitz, A. & Fersht, A. R. (1990) *J. Mol. Biol.* **214**, 613-617.
